# Supplementary material for: Crystal structure of a large cubic tin monosulfide polymorph: an unraveled puzzle
Source: Royal Society of Chemistry journal article supplement (doi:10.1039/c6ce00647g), 2016-01-01
Supplement: c6ce00647g1.pdf [file c6ce00647g1.pdf]

Supporting information for

## Crystal Structure of a Large Cubic Tin Mono-Sulfide Polymorph: an Unraveled Puzzle

R. E. Abutbul<sup>a,b</sup>, A. R. Garcia-Angelmo<sup>c</sup>, Z. Burshtein<sup>a</sup>, M. T. S. Nair<sup>c</sup>, P. K. Nair<sup>c,\*</sup>, Y. Golan<sup>a,b,\*</sup>.

<sup>a</sup>Department of Materials Engineering, Ben-Gurion University of the Negev, Beer-Sheva 84105, Israel.

<sup>b</sup>Ilse Katz Institute for Nanoscale Science and Technology, Ben-Gurion University of the Negev, Beer-Sheva 84105, Israel.

<sup>c</sup>Instituto de Energías Renovables, Universidad Nacional Autónoma de México, Temixco 62580, Morelos, Mexico.

Table S1: Summary of analyses of the XRD patterns of 260 nm thick SnS-CUB films deposited twice consecutively at 17°C for 10 hr.

| Sample processing        | $a$ (Å)     | grain diameter (Å) | Relative Intensity of ( $hkl$ ) Diffraction Peaks (%) |      |      |      |      |
|--------------------------|-------------|--------------------|-------------------------------------------------------|------|------|------|------|
|                          |             |                    | 222                                                   | 400  | 410  | 440  | 622  |
| <i>As-prepared*</i>      | 11.59±0.02  | 196.6              | 100                                                   | 94   | 23.2 | 25.2 | 13.1 |
| <i>Heated at 350°C</i>   | 11.59±0.015 | 193                | 100                                                   | 85.6 | 25.3 | 23.9 | 14.3 |
| <i>Heated at 400°C**</i> | 11.60±0.01  | 203                | 100                                                   | 87.6 | 25.8 | 23.7 | 15.4 |

\* Fig. 1(a) \*\* Fig. 1(b) in main text.
